# Supplementary material for: Enhancing the Potentiometric H2 Sensing of Pr0.1Ce0.9O2−δ Using Fe2O3 Surface Modification
Source: MDPI journal article supplement (doi:10.3390/chemosensors11040250), 2023-04-17
Supplement: s1 [file s1]

## Supplementary Materials

### Enhancing the potentiometric H<sub>2</sub> sensing of Pr<sub>0.1</sub>Ce<sub>0.9</sub>O<sub>2-δ</sub> using Fe<sub>2</sub>O<sub>3</sub> surface modification

Liang Wang, Jianxin Yi\*

State Key Laboratory of Fire Science, Department of Safety Science and Engineering, University of Science and Technology of China, Hefei 230026, China

\*Correspondence: yjx@ustc.edu.cn. Tel.: +86 551 63607817.

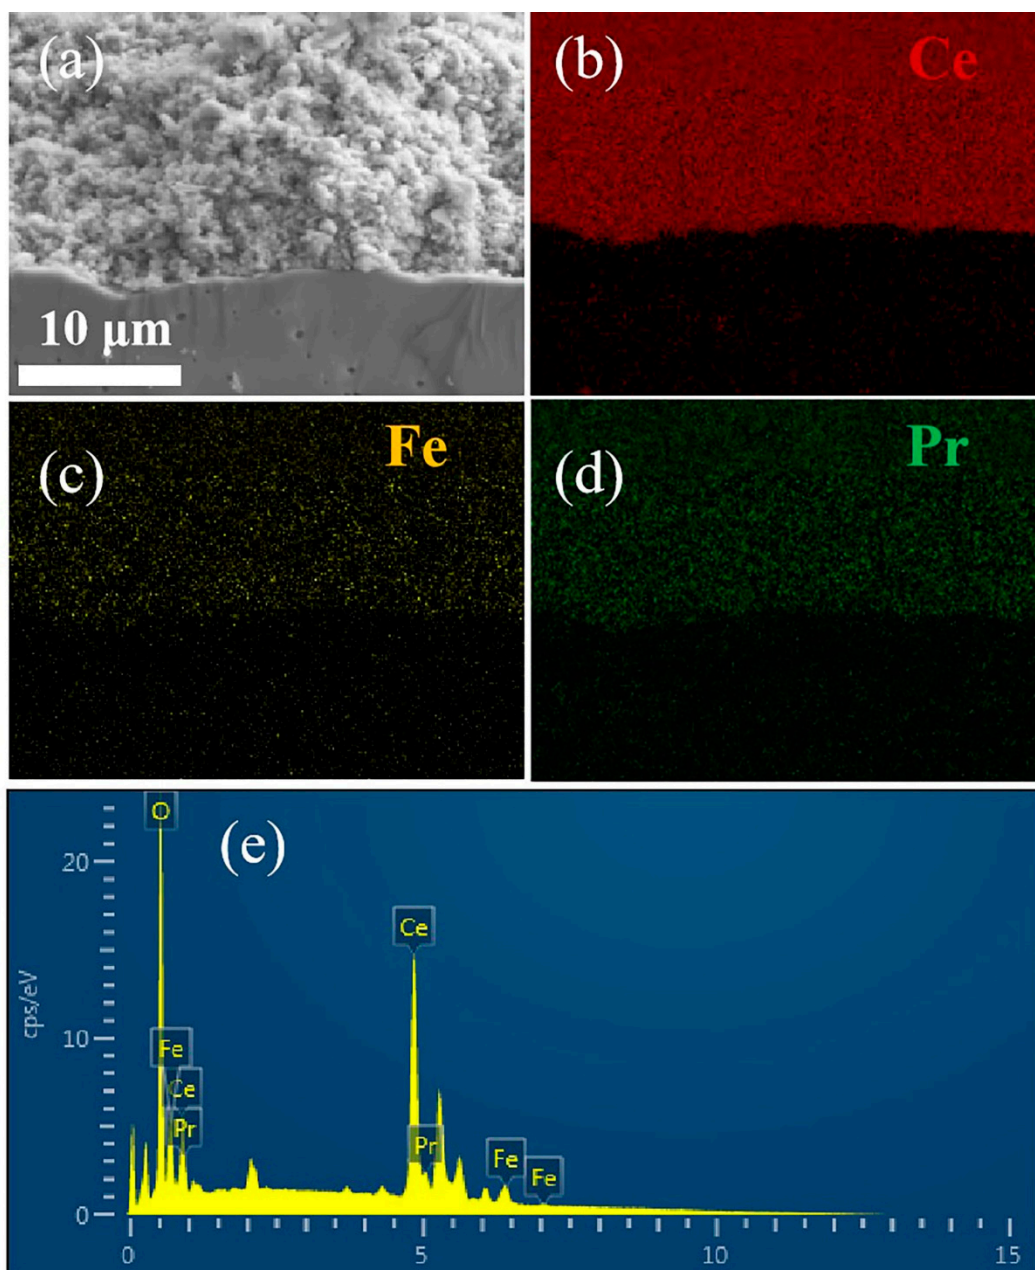

**Figure S1.** (a–d) Cross-section EDS mapping for PCO-Fe<sub>2</sub>O<sub>3</sub>; (e) Surface EDS quantification results of PCO-Fe<sub>2</sub>O<sub>3</sub>.

**Table S1.** Comparison of H<sub>2</sub> sensing characteristics of PCO-Fe<sub>2</sub>O<sub>3</sub> with literature data.

| SE material                           | Temp. (°C) | Conc. (ppm) | Re-sponse*(mV) | Detecting Range (ppm) | Sensitivity (mV/decade) | Reference |
|---------------------------------------|------------|-------------|----------------|-----------------------|-------------------------|-----------|
| ITO                                   | 535        | 5000        | 135–167        | 1000–20000            | 89.24                   | [33]      |
| ZnO(+Ta <sub>2</sub> O <sub>5</sub> ) | 500        | 100         | 600            | 100–400               | ~ 189                   | [34]      |
| ZnWO <sub>4</sub>                     | 600        | 30000       | 180            | 15000–30000           | 0.22                    | [35]      |
| ZrSiO <sub>4</sub> (+Au)              | 500        | 100         | 25             | 20–400                | ~ 169                   | [15]      |
| MnWO <sub>4</sub>                     | 500        | 960         | 110            | 80–960                | 78.07                   | [36]      |
| CdWO <sub>4</sub>                     | 518        | 30000       | 270            | 5000–30000            | 182                     | [37]      |
| CoWO <sub>4</sub>                     | 450        | 120         | 68             | 80–960                | 325.6                   | [38]      |
| LSCF                                  | 450        | 100         | 55             | 100–1000              | 90                      | [14]      |
| SnO <sub>2</sub> nanofibers           | 450        | 1000        | 289.1          | 140–2000              | 158.6                   | [28]      |
| LSF                                   | 450        | 1000        | 196.08         | 100–1000              | 127                     | [16]      |
| PCO-Fe <sub>2</sub> O <sub>3</sub>    | 450        | 1000        | 184.3          | 20–1000               | 76.9                    | This work |

\* absolute values

## Reference

- Zhang, H.; Yi, J.; Jiang, X. Fast Response, Highly Sensitive and Selective Mixed-Potential H<sub>2</sub> Sensor Based on (La, Sr)(Cr, Fe)O<sub>3-δ</sub> Perovskite Sensing Electrode. *ACS Appl. Mater. Interfaces* **2017**, *9*, 17218–17225.
- Anggraini, S.A.; Ikeda, H.; Miura, N. Tuning H<sub>2</sub> Sensing Performance of Zirconia-based Sensor using ZrSiO<sub>4</sub>(+Au) Sensing-electrode. *Electrochim. Acta* **2015**, *171*, 7–12.
- Zhang, H.; Yi, J.; Zhang, Z.; Zhang, H. The relation between mixed-potential hydrogen response and electrochemical activities for perovskite oxides. *Sens. Actuators B Chem.* **2022**, *352*, 130988.
- Yi, J.; Zhang, H.; Zhang, Z.; Chen, D. Hierarchical porous hollow SnO<sub>2</sub> nanofiber sensing electrode for high performance potentiometric H<sub>2</sub> sensor. *Sens. Actuators B Chem.* **2018**, *268*, 456–464.
- Sekhar, P.K.; Brosha, E.L.; Mukundan, R.; Nelson, M.A.; Williamson, T.L.; Garzon, F.H. Development and testing of a miniaturized hydrogen safety sensor prototype, *Sens. Actuators B Chem.* **2010**, *148*(2), 469–477.
- Anggraini, S.A.; Breedon, M. N.; Miura. Sensing characteristics of aged zirconia-based hydrogen sensor utilizing Zn–Ta-based oxide sensing-electrode, *Electrochemistry Communications*. **2013**, *31*, 133–136.
- Tang, Z.; Li, X.; Yang, J.; Yu, J.; Wang, J.; Tang, Z. Mixed potential hydrogen sensor using ZnWO<sub>4</sub> sensing electrode, *Sens. Actuators B Chem.* **2014**, *195*, 520–525..
- Li, Y.; Li, X.; Tang, Z.; Tang, Z.; Yu, J.; Wang, J. Hydrogen sensing of the mixed-potential-type MnWO<sub>4</sub>/YSZ/Pt sensor, *Sens. Actuators B Chem.* **2015**, *206*, 176–180.
- Li, Y.; Li, X.; Tang, Z.; Wang, J.; Yu, J.; Tang, Z. Potentiometric hydrogen sensors based on yttria-stabilized zirconia electrolyte (YSZ) and CdWO<sub>4</sub> interface, *Sens. Actuators B Chem.* **2016**, *223*, 365–371.
- Li, Y.; Li, X.; Wang, J.; Jun, Y.; Tang, Z. A cobalt tungstate compound sensing electrode for hydrogen detection based upon mixed-potential type sensors, *Rsc Adv.* **2017**, *7*(5), 2919–2925.
